# Supplementary material
Source: PubMed Central journal article supplement (PMC3660111)
Supplement: Supp_Fig1.pdf [file Supp_Fig1.pdf]

## Supplementary Data

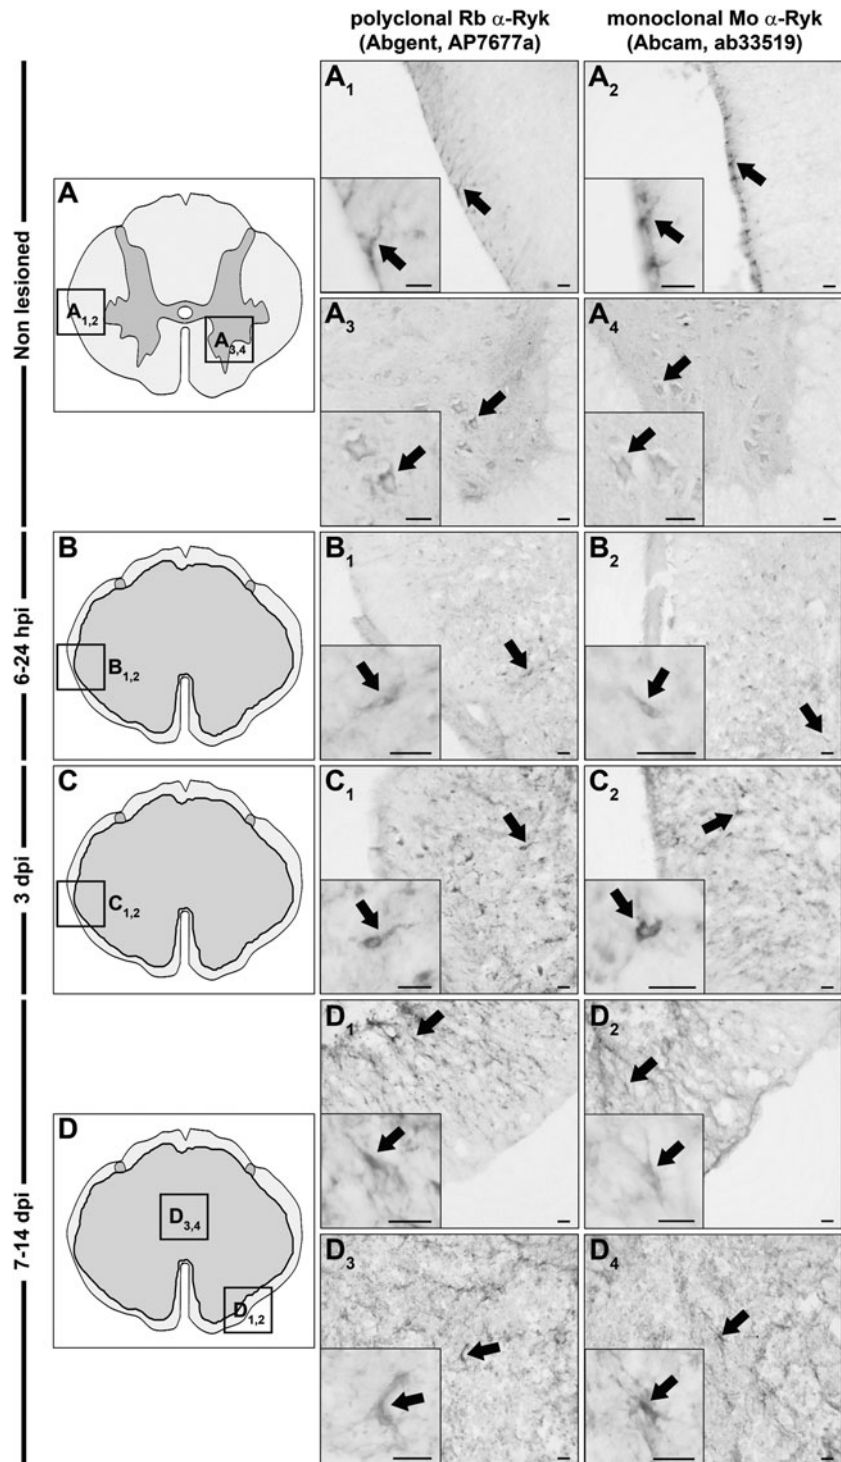

**SUPPLEMENTARY FIG. S1.** Immunohistochemical analysis of Ryk expression pattern by using different primary antibodies. This figure shows representative images obtained from the evaluation of Ryk expression pattern by using different primary antibodies. The antibodies used were a polyclonal rabbit (Rb) anti-Ryk (Abgent, AP7677a) and a monoclonal mouse (Mo) anti-Ryk (Abcam, ab33519) that were generated against peptides within amino acids 150–200 and 462–475 of human Ryk, respectively. Cromogen-based simple immunohistochemistries were performed both in non-lesioned spinal cords (A and A<sub>1-4</sub>) and after injury at 6–24 hours post-injury (hpi) (B and B<sub>1-2</sub>), 3 days post-injury (dpi) (C and C<sub>1-2</sub>) and 7–14 dpi (D and D<sub>1-4</sub>). The squares in the schematic drawings of representative transverse sections (A, B, C and D) represent the areas where the corresponding higher magnification micrographs were obtained. Scale bars in A<sub>1-4</sub>, B<sub>1-2</sub>, C<sub>1-2</sub> and D<sub>1-4</sub> = 20  $\mu$ m.
